# Supplementary material for: Genetic characteristics of P. falciparum parasites collected from 2012 to 2016 and anti-malaria resistance along the China-Myanmar border
Source: PubMed Central journal article supplement (PMC10637670; doi:10.1371/journal.pone.0293590), 2023-11-10
Supplement: pone.0293590.s001.pdf [file pone.0293590.s001.pdf]

和初步数据分析。GenAlEx 软件可以帮助我们实现这个目的。这个软件可以从 <http://biology-assets.anu.edu.au/GenAlEx/Download.html> 这一网址下载。

GenAlEx 软件是在 Microsoft Excel 下使用，要调用宏，因此我们首先要把 Excel 的宏“安全级”设为“中”(图 3-39, 图 3-40)。然后点击“GenAlEx 6.501.xla”加载 GenAlEx 这个软件(图 3-41)，Excel 提示“启用宏”，点击启用(图 3-42)，软件就加载入 Excel 了。作者提供了一个“mg.xls”文件作演示用，其数据格式说明见图 3-43。这个演示文件包括两个种群，如果读者的数据是多个种群，如 10 个种群，那么就把数据第一行的 2 改成 10，然后依次把每个种群的个体数目写在随后的数据格中。

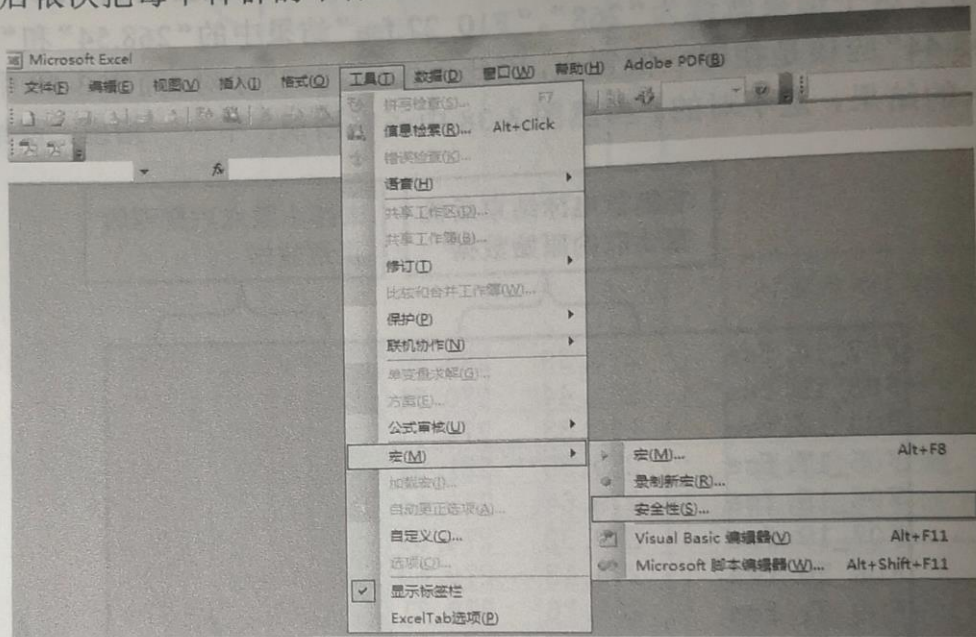

图 3-39 调整 Excel 的宏安全性之一

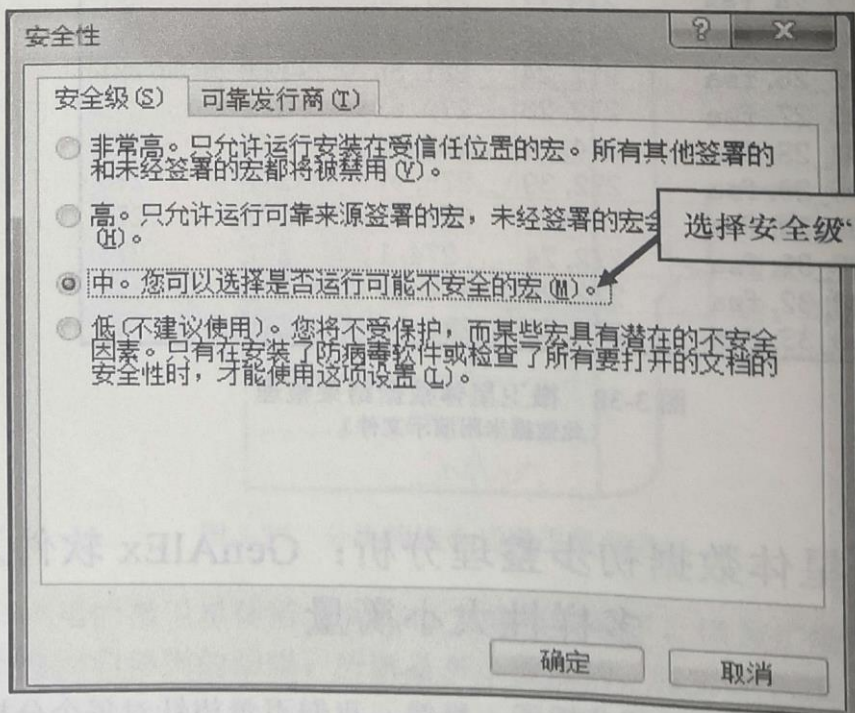

图 3-40 调整 Excel 的宏安全性之二

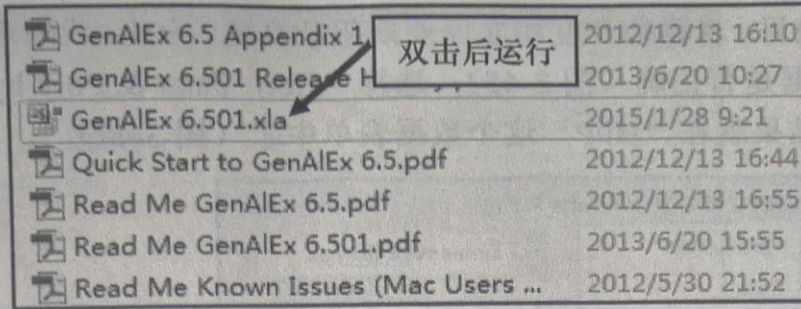

图 3-41 运行 GenAEx 软件

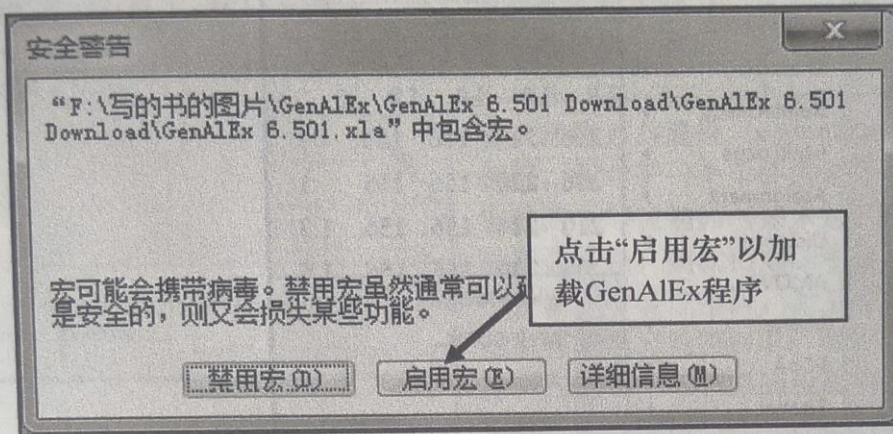

图 3-42 启用宏后在 Excel 中加载 GenAEx 程序软件

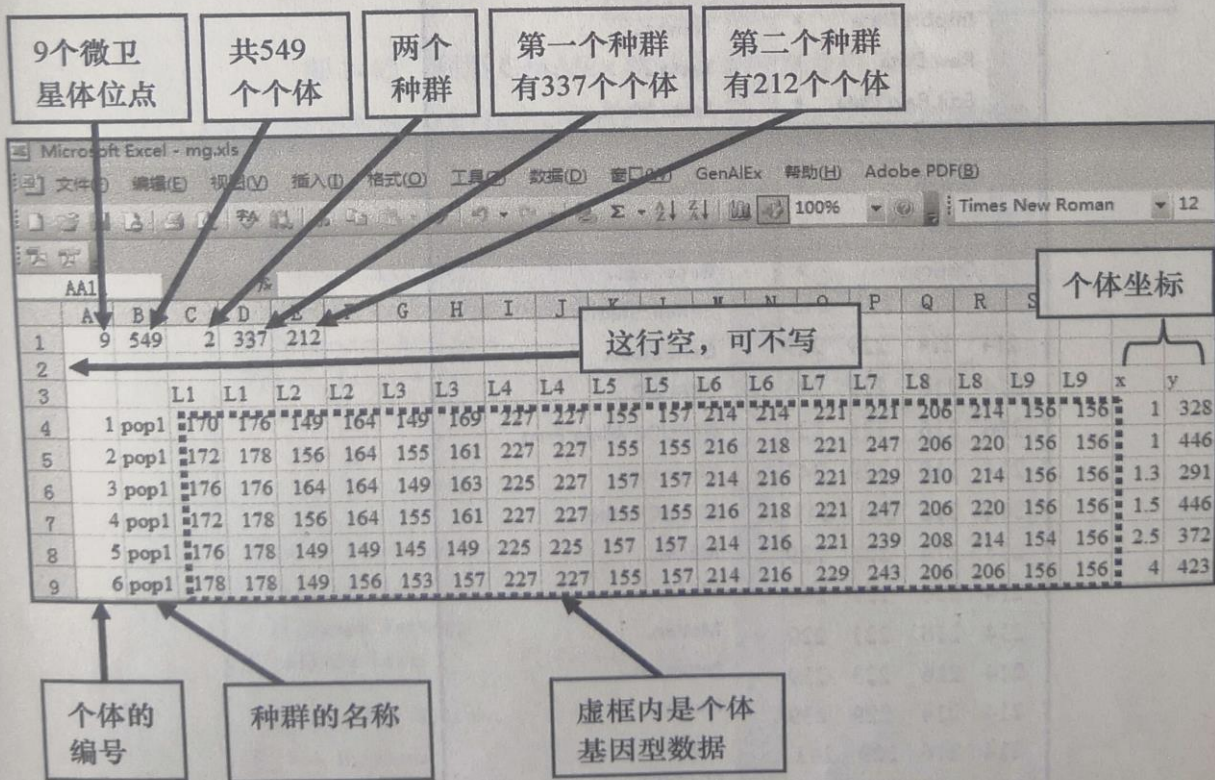

图 3-43 GenAEx 软件数据格式

GenAEx 软件提供了非常丰富的内容，可以帮助我们对数据进行初步的分析和多个软件间的格式转换（图 3-44）。作者将用它的“Export Data”功能做 AIS 和 Genepop 软件的数据格式转换。在这之前我们可以先看下数据的大致统计结果。我们主要看三个统

计参数：等位基因数目、观测杂合度和非偏差期望杂合度。为此，我们选择“Frequency...” (图 3-44)，检查数据是否正确 (图 3-45)，选择“Het, Fstat & Poly by Pop” (图 3-46) 后，点击“OK”，结果就在“HFP”这个数据表单中了 (图 3-47)。

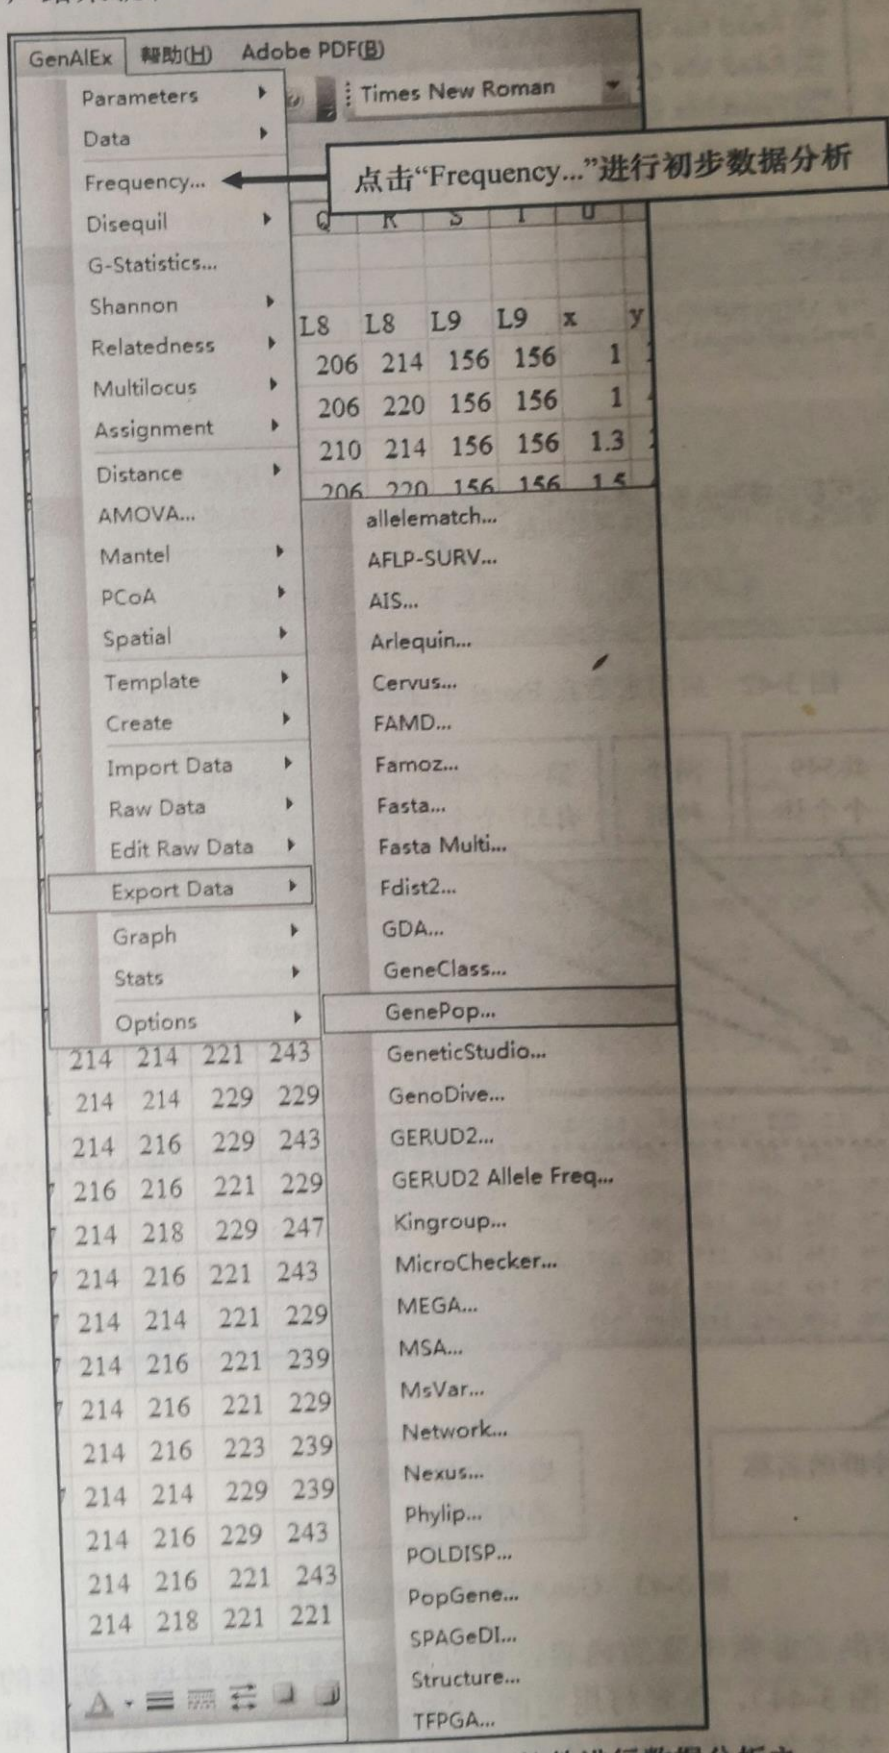

图 3-44 利用 GenAlEx 软件进行数据分析之一

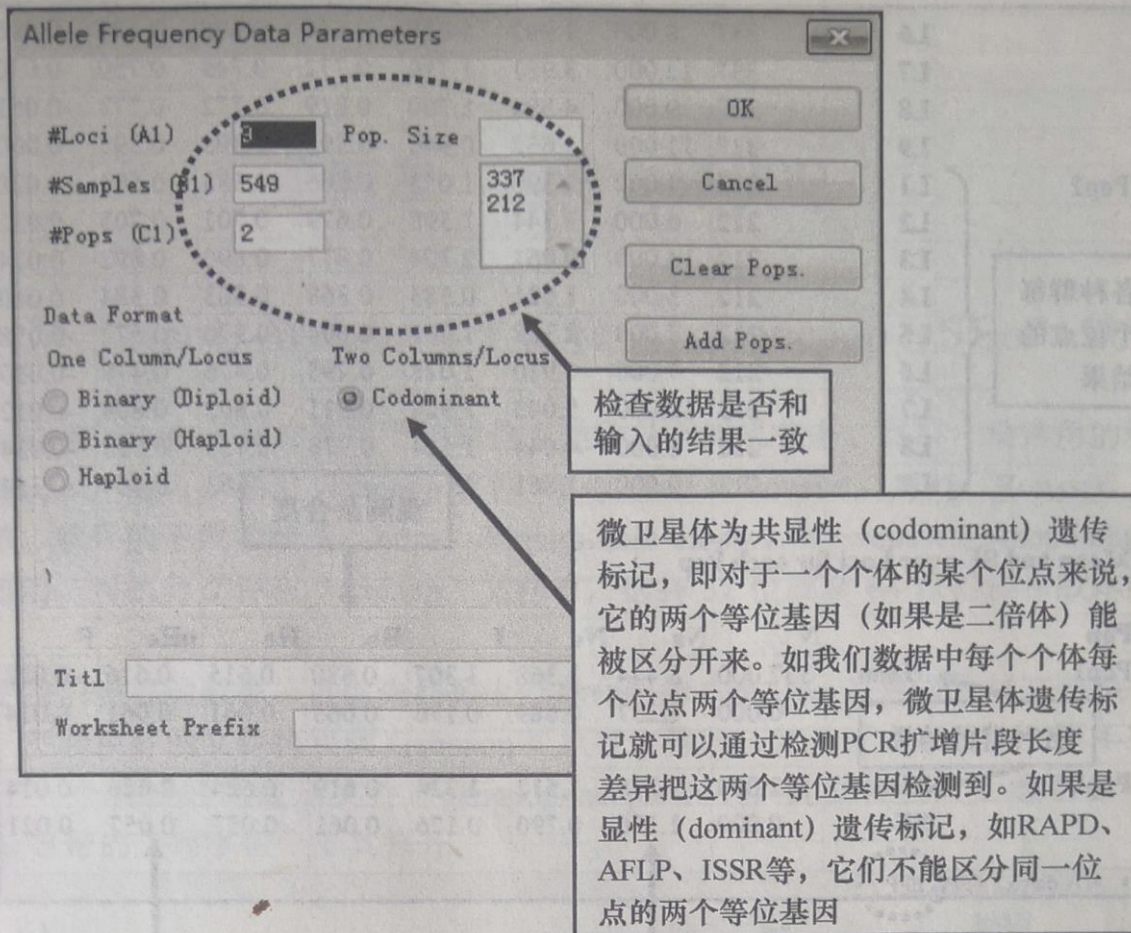

图 3-45 利用 GenA1Ex 软件进行数据分析之二

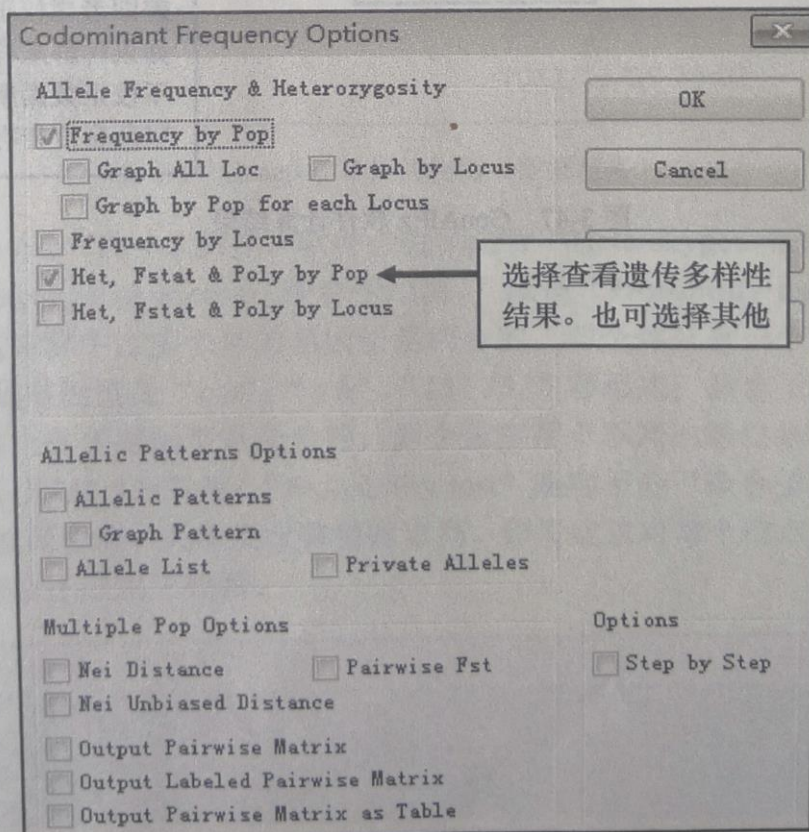

图 3-46 利用 GenA1Ex 软件进行数据分析之三

|    |                                    |      |         |        |       |       |       |       |       |        |
|----|------------------------------------|------|---------|--------|-------|-------|-------|-------|-------|--------|
| 18 |                                    | L6   | 337     | 8.000  | 1.993 | 1.018 | 0.546 | 0.498 | 0.499 | -0.096 |
| 19 |                                    | L7   | 337     | 12.000 | 3.981 | 1.710 | 0.772 | 0.749 | 0.750 | -0.030 |
| 20 |                                    | L8   | 337     | 9.000  | 4.384 | 1.700 | 0.819 | 0.772 | 0.773 | -0.061 |
| 21 |                                    | L9   | 337     | 11.000 | 1.652 | 0.940 | 0.395 | 0.395 | 0.395 | 0.000  |
| 22 | Pop2                               | L1   | 212     | 4.000  | 2.396 | 1.053 | 0.566 | 0.583 | 0.584 | 0.028  |
| 23 |                                    | L2   | 212     | 6.000  | 3.344 | 1.398 | 0.679 | 0.701 | 0.703 | 0.031  |
| 24 |                                    | L3   | 212     | 14.000 | 9.061 | 2.304 | 0.877 | 0.890 | 0.892 | 0.014  |
| 25 |                                    | L4   | 212     | 3.000  | 1.621 | 0.583 | 0.368 | 0.383 | 0.384 | 0.040  |
| 26 |                                    | L5   | 212     | 7.000  | 2.328 | 1.061 | 0.604 | 0.570 | 0.572 | -0.058 |
| 27 |                                    | L6   | 212     | 7.000  | 1.910 | 1.028 | 0.495 | 0.476 | 0.478 | -0.039 |
| 28 |                                    | L7   | 212     | 12.000 | 5.043 | 1.924 | 0.811 | 0.802 | 0.804 | -0.012 |
| 29 |                                    | L8   | 212     | 8.000  | 4.044 | 1.524 | 0.778 | 0.753 | 0.755 | -0.034 |
| 30 |                                    | L9   | 212     | 9.000  | 1.861 | 1.163 | 0.463 | 0.464 | 0.464 | 0.154  |
| 31 |                                    |      |         |        |       |       |       |       |       |        |
| 32 | Mean and SE over Loci for each Pop |      |         |        |       |       |       |       |       |        |
| 33 |                                    |      |         |        |       |       |       |       |       |        |
| 34 | Pop                                |      | N       | Na     | Ne    | I     | Ho    | He    | uHe   | F      |
| 35 | Pop1                               | Mean | 337.000 | 8.444  | 3.368 | 1.307 | 0.630 | 0.615 | 0.616 | -0.022 |
| 36 |                                    | SE   | 0.000   | 1.237  | 0.689 | 0.176 | 0.065 | 0.061 | 0.061 | 0.014  |
| 37 |                                    |      |         |        |       |       |       |       |       |        |
| 38 | Pop2                               | Mean | 212.000 | 7.778  | 3.512 | 1.324 | 0.619 | 0.624 | 0.626 | 0.014  |
| 39 |                                    | SE   | 0.000   | 1.176  | 0.790 | 0.176 | 0.061 | 0.057 | 0.057 | 0.021  |
| 40 |                                    |      |         |        |       |       |       |       |       |        |

各种群每个位点的结果

观测杂合度

各种群的结果

等位基因数目

非偏差期望杂合度 (非偏差即考虑校正种群大小。如果种群采样数目较少, 不校正数据所算出的期望杂合度会有较大偏差)

图 3-47 GenAlEx 软件计算结果

# 第五章 遗传分化

## 第一节 $F_{ST}$ 分析: Genetix 软件

遗传分化是衡量种群间遗传差异的重要参数。有两种最基本的度量值，一种是  $F_{ST}$  值，另一种是  $\Phi_{ST}$  值。不论  $F_{ST}$  值还是  $\Phi_{ST}$  值，对于多种群（两个以上种群）来说，它们都可分为总值和两两之间的值。总值是把所有种群总体计算得出的一个总体衡量值，而两两之间的遗传分化值就是每一对种群间计算的值。

首先介绍如何进行  $F_{ST}$  值的计算。在此介绍使用 Genetix 软件 (Belkhir et al., 1996-2004)，它可以从 <http://kimura.univ-montp2.fr/genetix/constr.htm#download> 下载（这个软件界面是法文的）（图 5-1）。

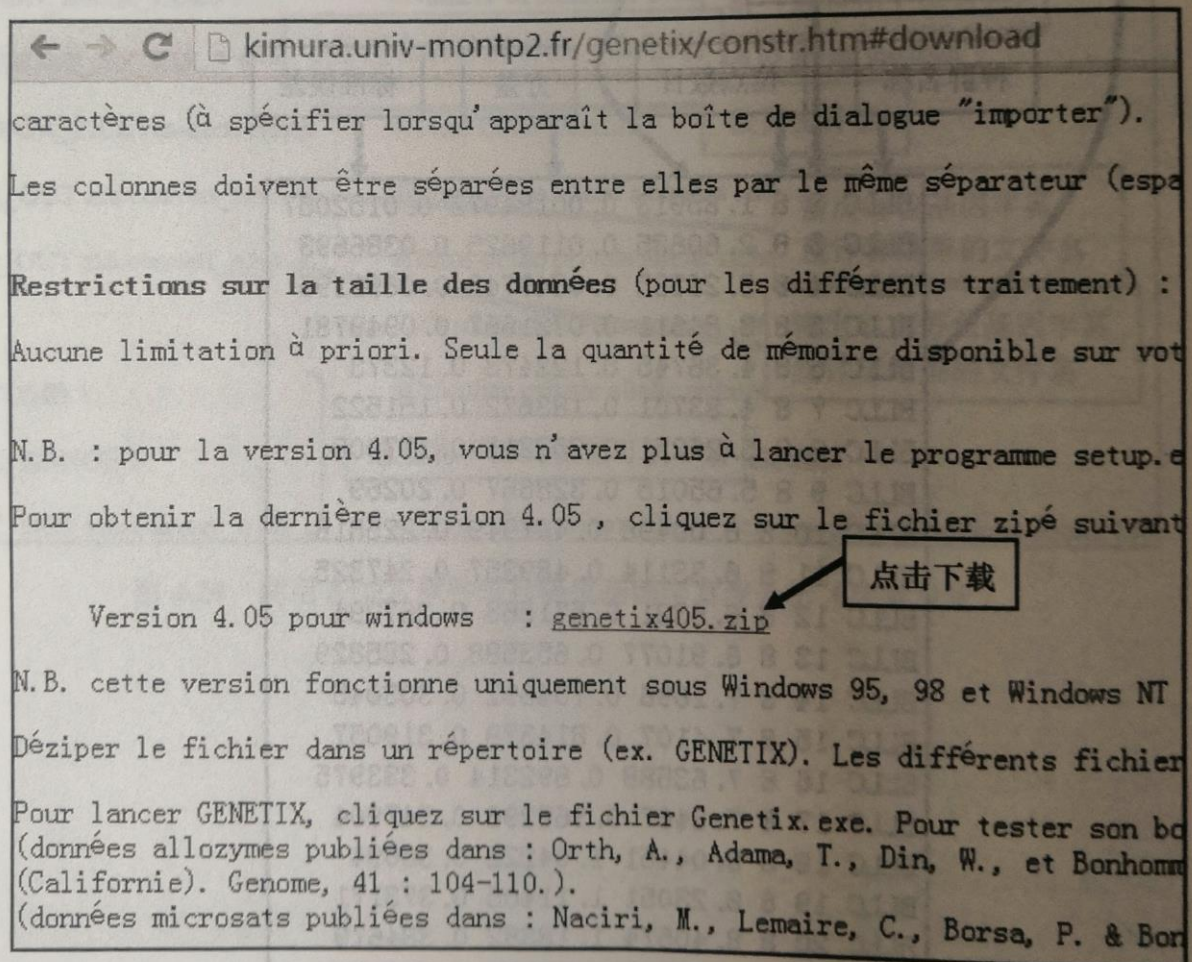

图 5-1 下载 Genetix 软件

下载后解压缩，双击“Genetix.exe”就可使用。Genetix 软件也有自己的数据输入格式，但也可以使用其他软件的格式。可以先用 GenAlEx 软件中的“Export Data”功能把我们的数据转换为“GenePop”格式，然后使用 Genetix 软件中的“Importer”功能把数

两两结果计算后，如对于种群 1 和种群 3，遗传分化  $F_{ST}$  值为 0.029 75，1000 次模拟结果表明这个值非常显著 ( $P < 0.01$ )，因为没有一次模拟结果大于它 (0.00%) (图 5-10)。如果两两种群的 “% val >” 这个结果是 0.02，表示 1000 次模拟结果中只有 0.02% 的结果是大于 0.029 75 的，那么  $P$  值是 0.02，小于 0.05，也是显著的。

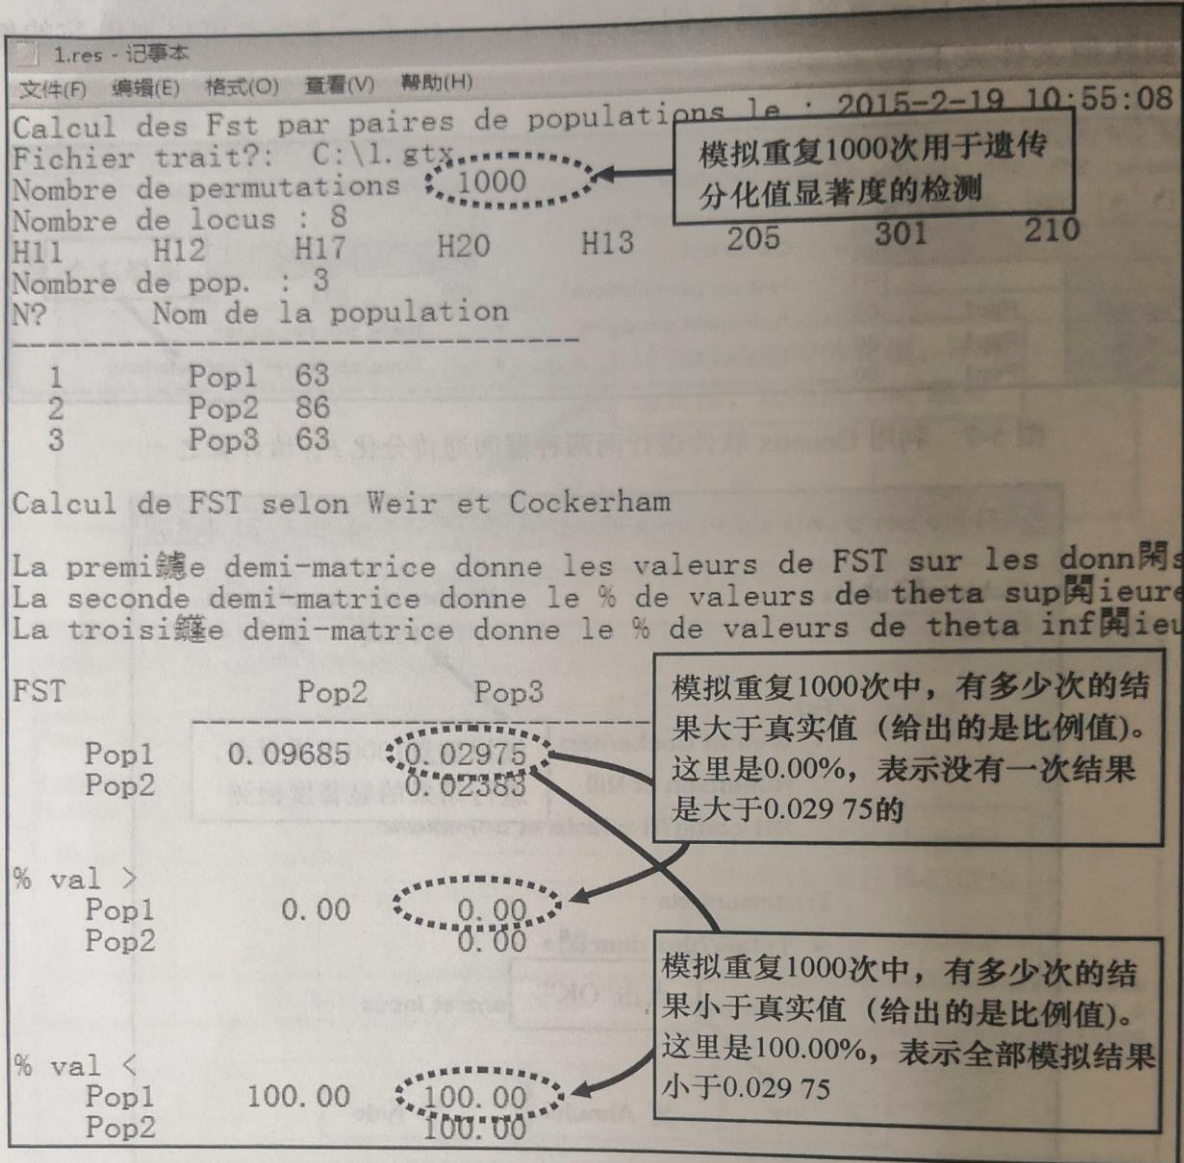

图 5-10 利用 Genetix 软件计算的两两种群间遗传分化  $F_{ST}$  值结果

## 第二节 AMOVA 分析: GenAlEx 软件

衡量种群遗传分化的另外一种方法是分子方差分析 (analysis of molecular variance, AMOVA) 方法 (Excoffier et al., 1992)。不同于  $F_{ST}$  使用等位基因频率的方法计算种群间遗传分化，AMOVA 方法使用遗传距离 (genetic distance) 的方法来进行种群间遗传分化的衡量，扩展了遗传分化使用的范围 (如个体序列间的差异不仅能用基因频率的方法衡量，还可以用两者之间碱基差异多少进行衡量)，使得利用各种分子标记 (如 RFLP、RAPD、AFLP、DNA 序列等) 都可以进行遗传分化分析。为区别于  $F_{ST}$  值，AMOVA 用  $\Phi_{ST}$  值来代表。

我们可以使用前面介绍的 GenAlEx 软件进行 AMOVA 分析，操作方便。在此用“1.xls”

据读入 (图 5-2, 图 5-3)。在此用作者转换好的一个数据“1.gtx”进行演示。这个文件包含了三个种群。首先, 我们计算总的遗传分化值。打开文件, 然后按图 5-4 和图 5-5 操作。计算完成后软件提示“TRAITEMENT FINI!”说明运算结束, 点击“确定”就可以,

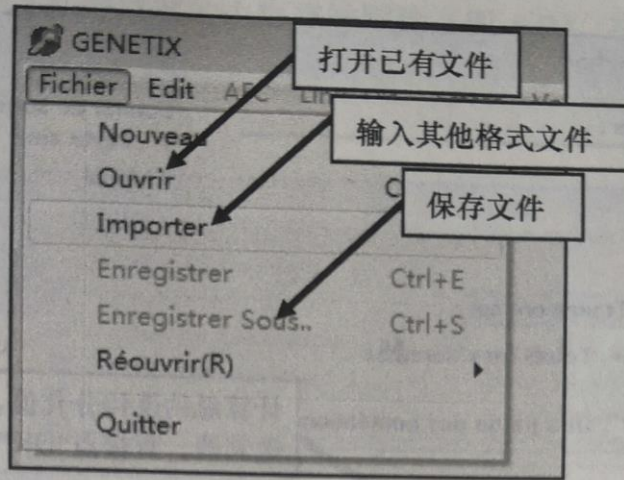

图 5-2 Genetix 软件数据输入、保存

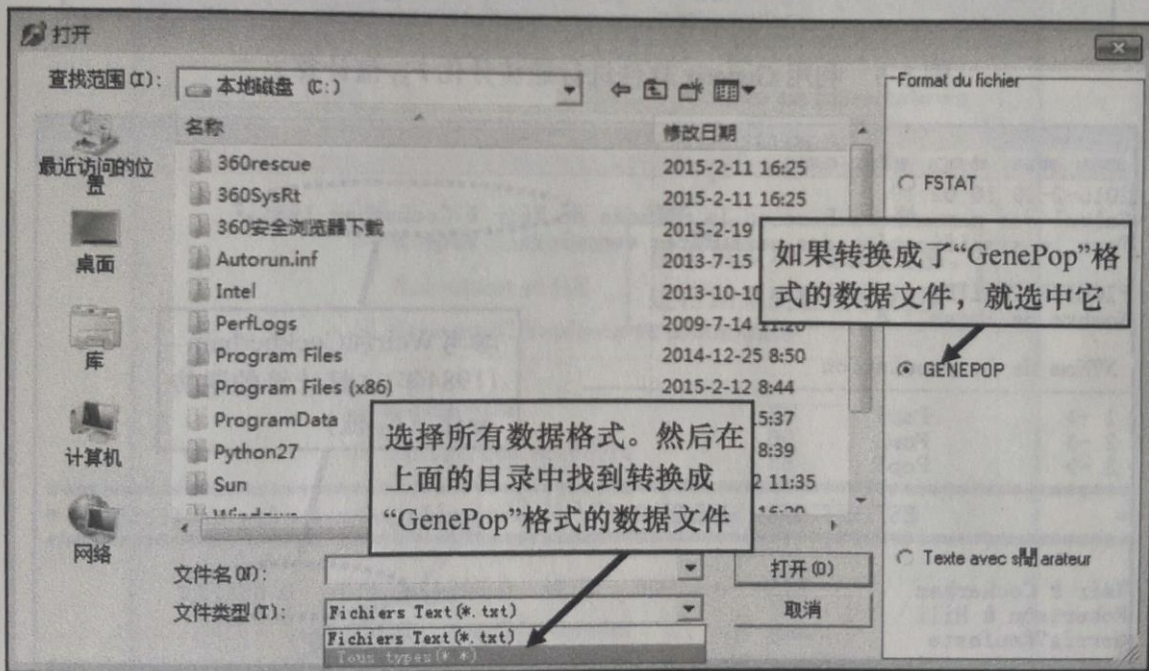

图 5-3 利用 Genetix 软件输入不同格式的文件

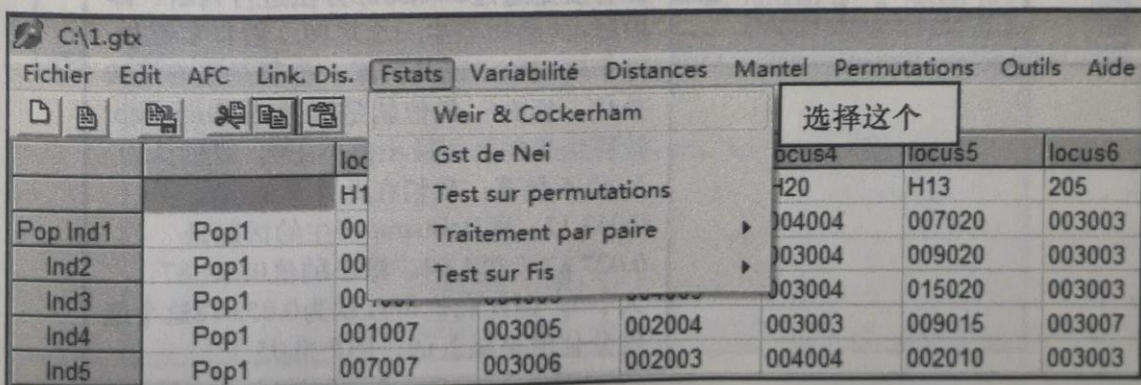

图 5-4 利用 Genetix 软件进行遗传分化  $F_{ST}$  值计算之一



然后软件自动打开运算的结果（如没有打开，结果文件“1.res”可用“记事本”工具打开），结果文件会自动保存在和数据文件同一文件夹下。例如，作者的数据文件是放在C盘的根目录下（即“C: \”），运算的结果也被放在了在这个目录下。结果分析请见图 5-6。

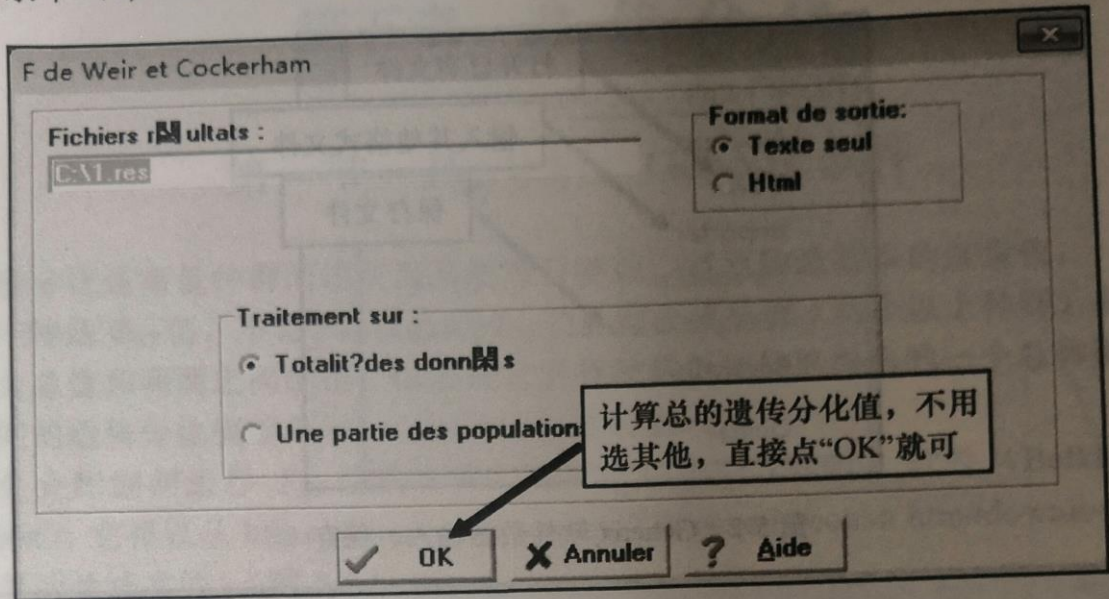

图 5-5 利用 Genetix 软件进行遗传分化  $F_{ST}$  值计算之二

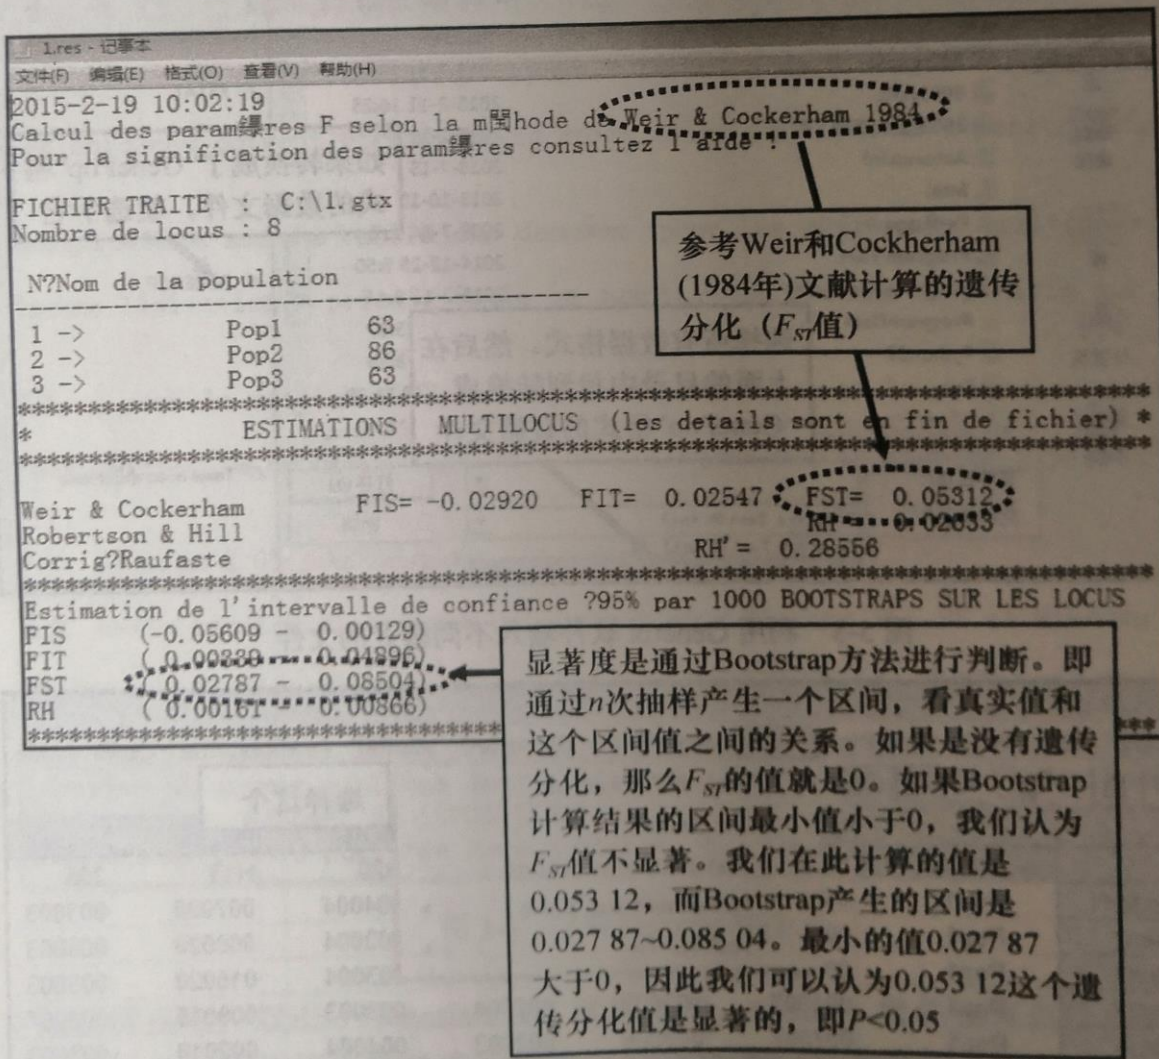

图 5-6 利用 Genetix 软件计算的种群间遗传分化  $F_{ST}$  值结果

算完总的遗传分化值后，我们可以计算两两种群间的遗传分化（图 5-7，图 5-8）。由于刚才计算了总的遗传分化的值，文件被保存在了“1.res”文件中，现在又计算两两遗传分化的值，也要被保存在这个文件中，那么以前被保存的内容有可能被删除，因此软件提示“1.res”这个文件中以前的内容将被删除（图 5-9）。在此选“Oui”，表示删除以前的结果，因为前面计算的结果我们已经看过，不用了。读者也可以把以前的结果转移保存到其他文件夹下。

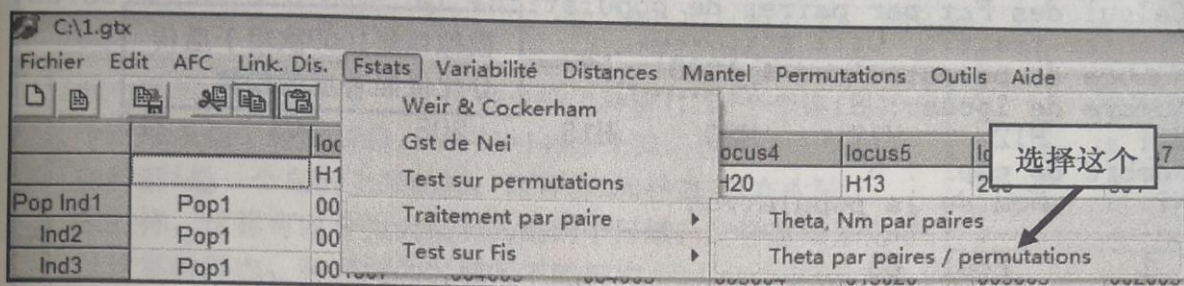

图 5-7 利用 Genetix 软件进行两两种群间遗传分化  $F_{ST}$  值计算之一

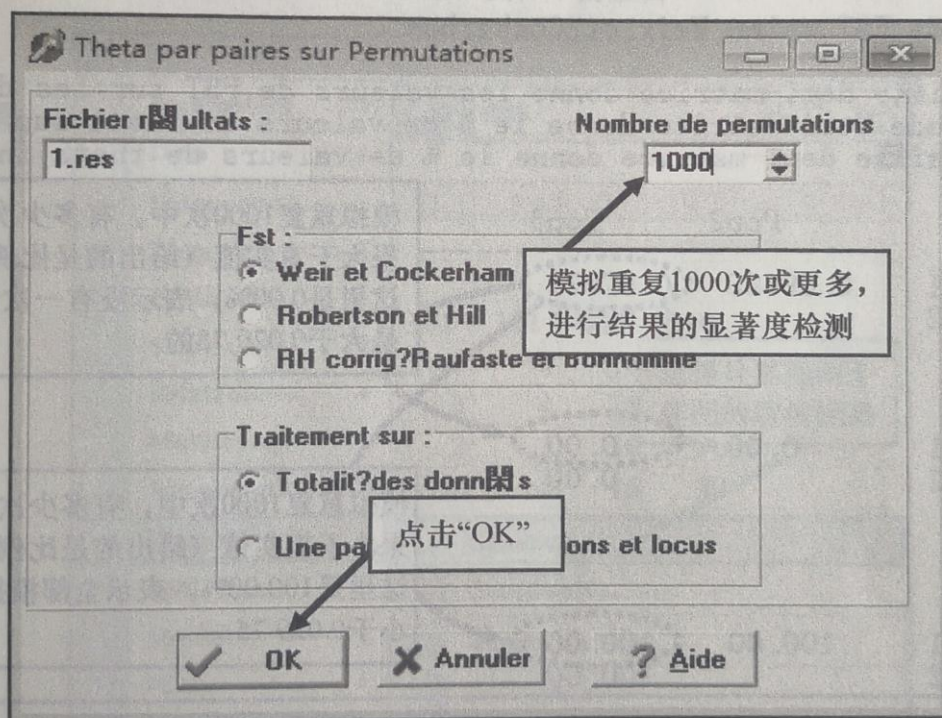

图 5-8 利用 Genetix 软件进行两两种群间遗传分化  $F_{ST}$  值计算之二

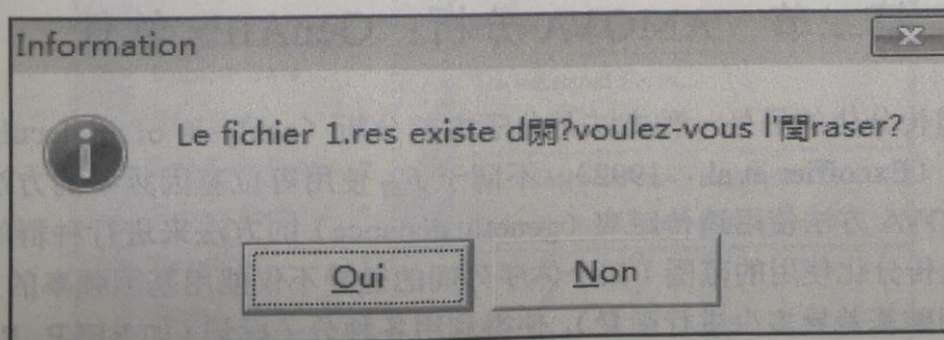

图 5-9 因为用同一文件名保存数据，Genetix 软件询问是否保留原有结果

照图 5-13~图 5-17 进行操作。值得说明的是，我们这里是用 GenAlEx 软件计算两个体间的遗传距离，但也可以用其他方法算得的遗传距离进行 AMOVA 计算。另外就是 AMOVA 计算可以用 Arlequin 软件进行计算，但其操作较复杂些，不如 GenAlEx 软件操作方便。Arlequin 软件可从 <http://cmpg.unibe.ch/software/arlequin35/> 下载。

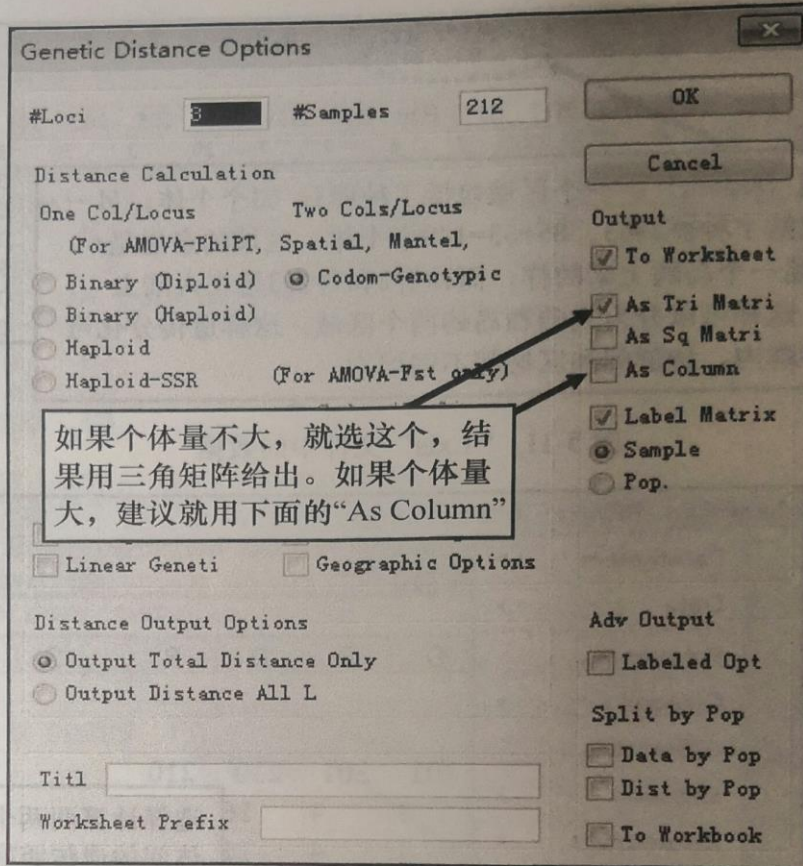

图 5-13 利用 GenAlEx 软件进行  $\Phi_{ST}$  值计算之二

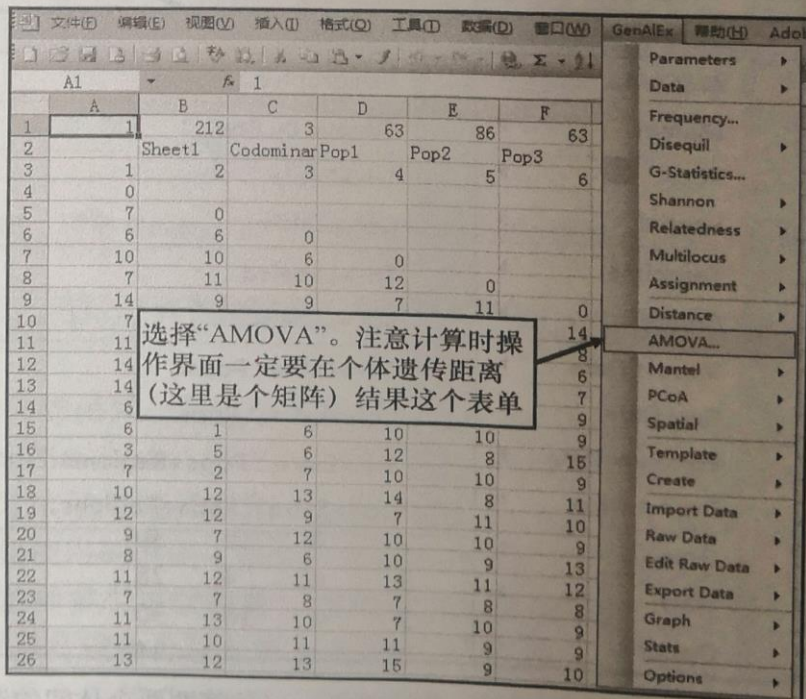

图 5-14 利用 GenAlEx 软件进行  $\Phi_{ST}$  值计算之三

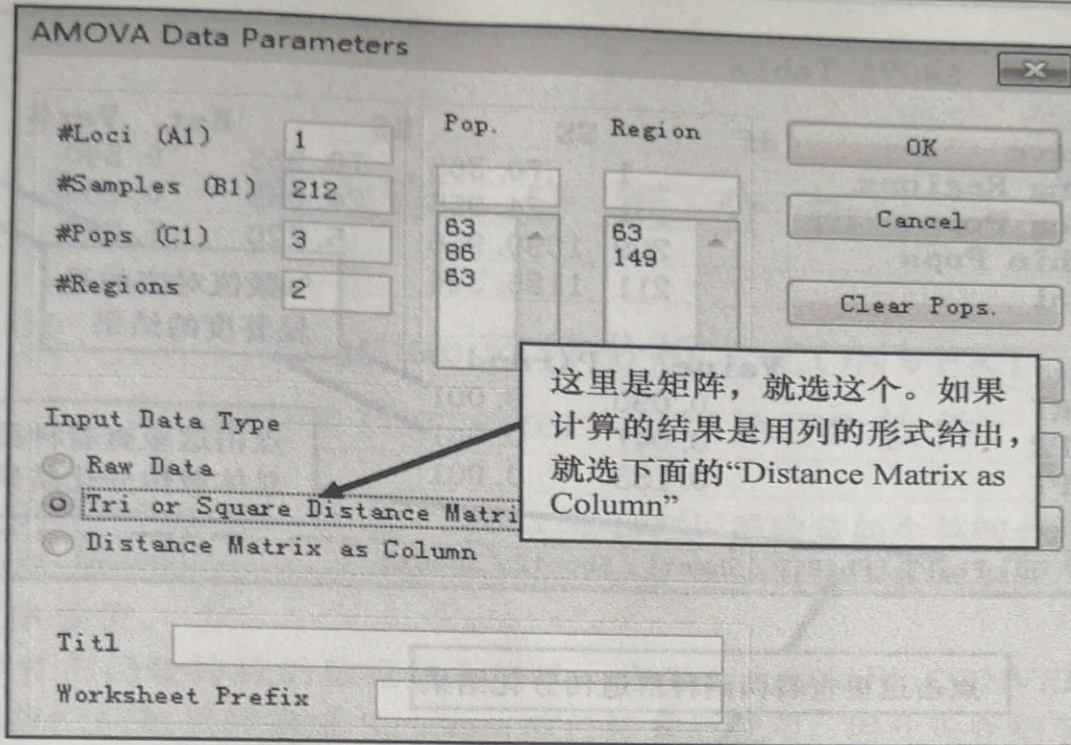

图 5-15 利用 GenAlEx 软件进行  $\Phi_{ST}$  值计算之四

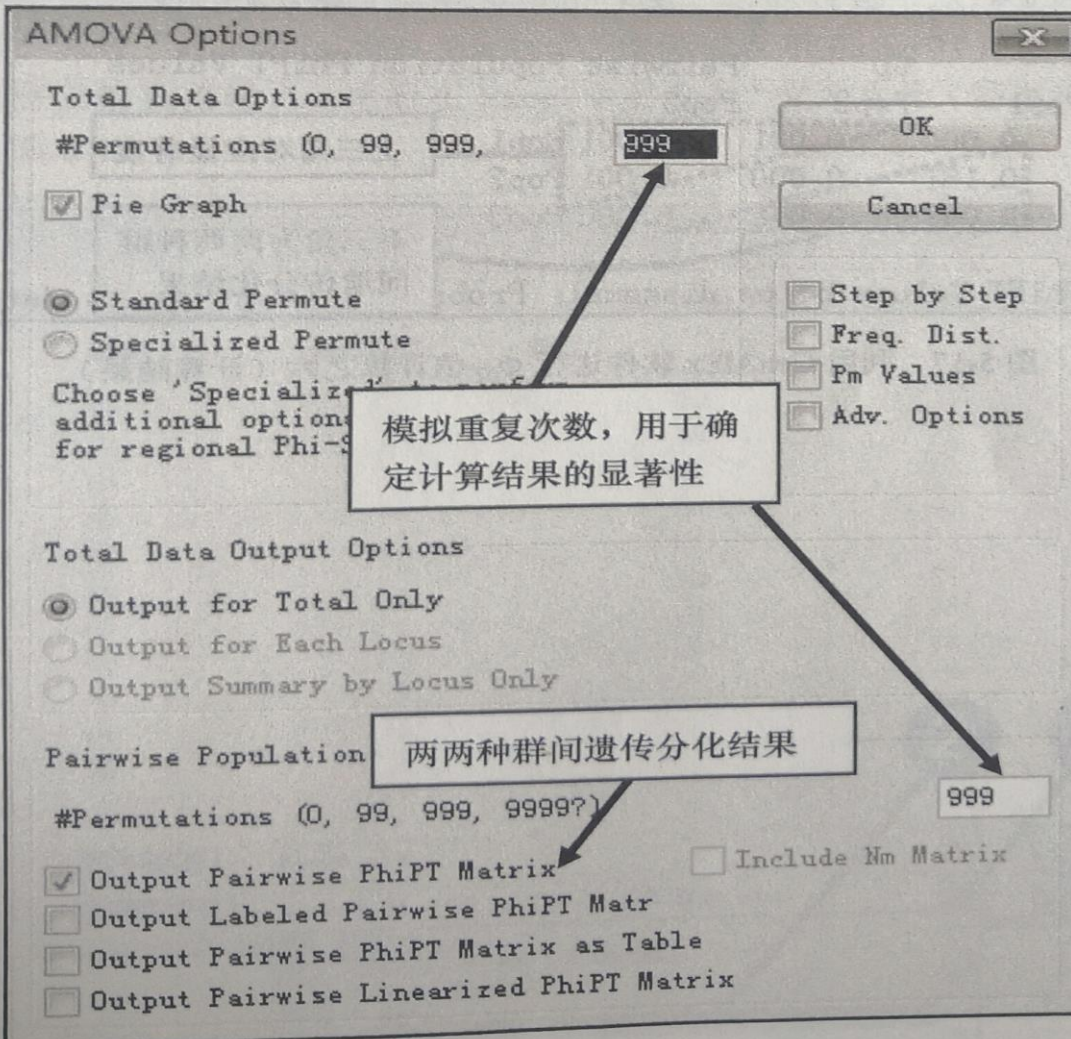

图 5-16 利用 GenAlEx 软件进行  $\Phi_{ST}$  值计算之五

|    |                     |       |                 |        |           |
|----|---------------------|-------|-----------------|--------|-----------|
| 39 | Summary AMOVA Table |       |                 |        |           |
| 40 |                     |       |                 |        |           |
| 41 | Source              | df    | SS              | MS     | Est. Var% |
| 42 | Among Regions       | 1     | 70.363          | 70.363 | 0.540     |
| 43 | Among Pops          | 1     | 24.065          | 24.065 | 0.259     |
| 44 | Within Pops         | 209   | 1090.916        | 5.220  | 5.220     |
| 45 | Total               | 211   | 1185.344        |        |           |
| 46 |                     |       |                 |        |           |
| 47 | Stat                | Value | P(rand >= data) |        |           |
| 48 | PhiRT               | 0.090 | 0.001           |        |           |
| 49 | PhiPR               | 0.047 | 0.001           |        |           |
| 50 | PhiPT               | 0.133 | 0.001           |        |           |
| 51 |                     |       |                 |        |           |

%数值对应的是显著度的结果

点击这里查看种群总体遗传分化结果

点击这里查看两两种群遗传分化结果

|   |                                     |       |                                  |      |   |        |
|---|-------------------------------------|-------|----------------------------------|------|---|--------|
|   | A                                   | B     | C                                | D    | E | F      |
| 1 | 1                                   | 3     |                                  |      |   |        |
| 2 |                                     | GD    | Pairwise Population PhiPT Values |      |   |        |
| 3 | Pop1                                | Pop2  | Pop3                             |      |   |        |
| 4 | 0.000                               | 0.001 | 0.001                            | Pop1 |   |        |
| 5 | 0.181                               | 0.000 | 0.001                            | Pop2 |   |        |
| 6 | 0.059                               | 0.048 | 0.000                            | Pop3 |   |        |
| 7 |                                     |       |                                  |      |   |        |
| 8 | PhiPT Values below diagonal. Probab |       |                                  |      |   | (data) |

上三角对应显著度

下三角为两两种群间遗传分化结果

图 5-17 利用 GenAlEx 软件进行  $\Phi_{ST}$  值计算之六 (计算结果)
